# Supplementary material for: A new appraisal of ilmenite U–Pb dating method by LA-SF-ICP-MS
Source: Royal Society of Chemistry journal article supplement (doi:10.1039/d3ja00209h), 2023-10-07
Supplement: d3ja00209h2.pdf [file d3ja00209h2.pdf]

Table S-2 U-Pb analytical results of ilmenite sample HG79 calibrated by rutile RMJG in most probable ablation settings.

| Sample No.   |             | Analysis mode | 207Pb/235U |         | 206Pb/238U |        |      | Note   |
|--------------|-------------|---------------|------------|---------|------------|--------|------|--------|
|              |             |               | Ratio      | 2σ      | Ratio      | 2σ     | rho  |        |
| 44μm-4J-10Hz | spot        |               |            |         |            |        |      |        |
| 44×1μm10Hz   | line scan   |               |            |         |            |        |      |        |
| 2023515A6    | 79-44-10-01 | spot          | 11.2474    | 4.4108  | 0.1239     | 0.0278 | 0.57 |        |
| 2023515A7    | 79-44-10-02 | spot          | 4.3716     | 1.6036  | 0.0689     | 0.0184 | 0.73 |        |
| 2023515A8    | 79-44-10-03 | spot          | 0.9692     | 0.9199  | 0.0404     | 0.0123 | 0.32 |        |
| 2023515A9    | 79-44-10-04 | spot          | 9.8091     | 2.2740  | 0.1250     | 0.0223 | 0.77 |        |
| 2023515A10   | 79-44-10-05 | spot          | 2.5612     | 0.9037  | 0.0590     | 0.0167 | 0.80 |        |
| 2023515A11   | 79-44-10-06 | spot          | 7.1142     | 3.4328  | 0.0946     | 0.0395 | 0.86 |        |
| 2023515A12   | 79-44-10-07 | spot          | 18.6079    | 4.2481  | 0.2124     | 0.0430 | 0.89 |        |
| 2023515A13   | 79-44-10-08 | spot          | 9.1098     | 2.0206  | 0.1117     | 0.0203 | 0.82 |        |
| 2023515A14   | 79-44-10-09 | spot          | 14.1042    | 8.7605  | 0.1453     | 0.0646 | 0.72 |        |
| 2023515A15   | 79-44-10-10 | spot          | 12.2062    | 4.6701  | 0.1403     | 0.0367 | 0.68 |        |
| 2023515A17   | 79-44-10-12 | spot          | 10.4538    | 2.3442  | 0.1125     | 0.0294 | 0.99 |        |
| 2023515A18   | 79-44-10-13 | spot          | 8.4424     | 1.5926  | 0.1072     | 0.0220 | 0.99 |        |
| 2023515A19   | 79-44-10-14 | spot          | 10.6232    | 6.6614  | 0.1329     | 0.0849 | 0.99 |        |
| 2023515A20   | 79-44-10-15 | spot          | 10.3788    | 2.9734  | 0.1323     | 0.0288 | 0.76 |        |
| 2023515A26   | 79-44-10-16 | spot          | 6.8595     | 2.3048  | 0.0900     | 0.0199 | 0.66 |        |
| 2023515A27   | 79-44-10-17 | spot          | 11.3213    | 3.2407  | 0.1330     | 0.0335 | 0.88 |        |
| 2023515A28   | 79-44-10-18 | spot          | 13.1602    | 7.6987  | 0.1419     | 0.0737 | 0.89 |        |
| 2023515A29   | 79-44-10-19 | spot          | 11.9366    | 4.8031  | 0.1324     | 0.0385 | 0.72 |        |
| 2023515A30   | 79-44-10-20 | spot          | 17.6779    | 4.5243  | 0.2086     | 0.0677 | 0.99 |        |
| 2023515A31   | 79-44-10-21 | spot          | 3.8544     | 2.0720  | 0.0675     | 0.0158 | 0.44 |        |
| 2023515A32   | 79-44-10-22 | spot          | 4.0964     | 1.7368  | 0.0646     | 0.0176 | 0.64 |        |
| 2023515A33   | 79-44-10-23 | spot          | 2.2662     | 0.7501  | 0.0510     | 0.0096 | 0.57 |        |
| 2023515A34   | 79-44-10-24 | spot          | 35.2096    | 8.1786  | 0.3556     | 0.0703 | 0.85 |        |
| 2023515A35   | 79-44-10-25 | spot          | 20.9405    | 12.0513 | 0.2371     | 0.1583 | 0.99 |        |
| 2023515A36   | 79-44-10-26 | spot          | 7.3843     | 1.9824  | 0.0970     | 0.0189 | 0.72 |        |
| 2023515A38   | 79-44-10-28 | spot          | 2.4246     | 0.7164  | 0.0526     | 0.0121 | 0.78 |        |
| 2023515A39   | 79-44-10-29 | spot          | 2.9740     | 1.2836  | 0.0553     | 0.0123 | 0.52 |        |
| 2023515A46   | 79-44-10-31 | spot          | 15.9049    | 9.4040  | 0.1776     | 0.1312 | 0.99 |        |
| 2023515A47   | 79-44-10-32 | spot          | 0.6959     | 0.5769  | 0.0390     | 0.0072 | 0.22 |        |
| 2023515A48   | 79-44-10-33 | spot          | 2.6120     | 0.7538  | 0.0547     | 0.0151 | 0.95 |        |
| 2023515A49   | 79-44-10-34 | spot          | 1.5543     | 0.5725  | 0.0431     | 0.0085 | 0.54 |        |
| 2023515A50   | 79-44-10-35 | spot          | 16.7843    | 3.2458  | 0.1819     | 0.0375 | 0.99 |        |
| 2023515A51   | 79-44-10-36 | Line scan     | 6.5998     | 1.1062  | 0.0881     | 0.0124 | 0.84 |        |
| 2023515A52   | 79-44-10-37 | Line scan     | 29.8137    | 14.8815 | 0.2448     | 0.1173 | 0.96 |        |
| 2023515A53   | 79-44-10-38 | Line scan     | 2.0868     | 0.4636  | 0.0498     | 0.0085 | 0.76 |        |
| 2023515A54   | 79-44-10-39 | Line scan     | 1.5029     | 0.4401  | 0.0435     | 0.0055 | 0.43 |        |
| 2023515A16   | 79-44-10-11 | spot          | 37.0297    | 12.9539 | 0.4647     | 0.1518 | 0.93 | delete |
| 2023515A37   | 79-44-10-27 | spot          | 21.3055    | 22.6353 | 0.1845     | 0.0481 | 0.25 | delete |
| 2023515A40   | 79-44-10-30 | spot          | 4.6472     | 0.2506  | 0.3138     | 0.0140 | 0.81 | delete |
|              |             |               |            |         |            |        |      |        |
| 60μm-4J-6Hz  | spot        |               |            |         |            |        |      |        |
| 60×1μm6Hz    | line scan   |               |            |         |            |        |      |        |
| 2023517a6    | 79-60-6-01  | spot          | 33.8461    | 5.3244  | 0.3368     | 0.0505 | 0.95 |        |
| 2023517a7    | 79-60-6-02  | spot          | 6.9483     | 1.6790  | 0.0956     | 0.0167 | 0.72 |        |
| 2023517a8    | 79-60-6-03  | spot          | 1.8477     | 0.6062  | 0.0449     | 0.0082 | 0.55 |        |
| 2023517a9    | 79-60-6-04  | spot          | 4.1005     | 0.9246  | 0.0683     | 0.0114 | 0.74 |        |
| 2023517a10   | 79-60-6-05  | spot          | 2.9603     | 0.6882  | 0.0544     | 0.0082 | 0.65 |        |
| 2023517a11   | 79-60-6-06  | spot          | 5.4345     | 0.8896  | 0.0853     | 0.0112 | 0.80 |        |
| 2023517a12   | 79-60-6-07  | spot          | 3.5281     | 0.7313  | 0.0599     | 0.0096 | 0.77 |        |
| 2023517a13   | 79-60-6-08  | spot          | 2.9117     | 0.7491  | 0.0579     | 0.0097 | 0.65 |        |
| 2023517a14   | 79-60-6-09  | spot          | 5.2503     | 1.4368  | 0.0777     | 0.0159 | 0.75 |        |
| 2023517a15   | 79-60-6-10  | spot          | 3.3412     | 1.0356  | 0.0654     | 0.0124 | 0.61 |        |
| 2023517a16   | 79-60-6-11  | spot          | 2.2192     | 0.4813  | 0.0538     | 0.0085 | 0.73 |        |
| 2023517a17   | 79-60-6-12  | spot          | 16.1437    | 2.3674  | 0.1729     | 0.0243 | 0.96 |        |
| 2023517a18   | 79-60-6-13  | spot          | 3.2986     | 0.8962  | 0.0601     | 0.0105 | 0.64 |        |
| 2023517a19   | 79-60-6-14  | spot          | 5.8674     | 1.3813  | 0.0871     | 0.0156 | 0.76 |        |
| 2023517a20   | 79-60-6-15  | spot          | 1.6191     | 0.5959  | 0.0461     | 0.0066 | 0.39 |        |
| 2023517a26   | 79-60-6-16  | spot          | 1.6934     | 0.3116  | 0.0442     | 0.0042 | 0.51 |        |

|              |             |           |         |         |        |        |      |        |
|--------------|-------------|-----------|---------|---------|--------|--------|------|--------|
| 2023517a27   | 79-60-6-17  | spot      | 5.0480  | 1.1609  | 0.0762 | 0.0127 | 0.72 |        |
| 2023517a28   | 79-60-6-18  | spot      | 1.1969  | 0.4167  | 0.0422 | 0.0059 | 0.40 |        |
| 2023517a29   | 79-60-6-19  | spot      | 2.0896  | 0.5418  | 0.0489 | 0.0074 | 0.58 |        |
| 2023517a30   | 79-60-6-20  | spot      | 2.3012  | 0.5215  | 0.0502 | 0.0065 | 0.57 |        |
| 2023517a31   | 79-60-6-21  | spot      | 2.8339  | 1.1167  | 0.0551 | 0.0113 | 0.52 |        |
| 2023517a32   | 79-60-6-22  | spot      | 2.6254  | 0.7845  | 0.0575 | 0.0189 | 0.99 |        |
| 2023517a33   | 79-60-6-23  | spot      | 8.8831  | 1.7189  | 0.1132 | 0.0169 | 0.77 |        |
| 2023517a34   | 79-60-6-24  | spot      | 2.1141  | 0.6708  | 0.0482 | 0.0084 | 0.55 |        |
| 2023517a35   | 79-60-6-25  | spot      | 3.8901  | 0.8767  | 0.0669 | 0.0093 | 0.62 |        |
| 2023517a36   | 79-60-6-26  | spot      | 0.9005  | 0.4124  | 0.0409 | 0.0073 | 0.39 |        |
| 2023517a37   | 79-60-6-27  | spot      | 7.5468  | 1.4520  | 0.0993 | 0.0166 | 0.87 |        |
| 2023517a38   | 79-60-6-28  | spot      | 2.9851  | 0.7569  | 0.0578 | 0.0127 | 0.87 |        |
| 2023517a39   | 79-60-6-29  | spot      | 0.9663  | 0.3422  | 0.0404 | 0.0055 | 0.38 |        |
| 2023517a40   | 79-60-6-30  | spot      | 12.4513 | 2.0000  | 0.1467 | 0.0204 | 0.86 |        |
| 2023517a47   | 79-60-6-32  | Line scan | 1.8082  | 0.4645  | 0.0433 | 0.0067 | 0.60 |        |
| 2023517a48   | 79-60-6-33  | Line scan | 4.6998  | 0.9257  | 0.0744 | 0.0129 | 0.88 |        |
| 2023517a49   | 79-60-6-34  | Line scan | 2.5051  | 0.5821  | 0.0541 | 0.0092 | 0.73 |        |
| 2023517a50   | 79-60-6-35  | Line scan | 2.5924  | 0.9793  | 0.0521 | 0.0136 | 0.69 |        |
| 2023517a51   | 79-60-6-36  | Line scan | 1.1892  | 0.3681  | 0.0414 | 0.0060 | 0.47 |        |
| 2023517a52   | 79-60-6-37  | Line scan | 6.0779  | 1.3374  | 0.0876 | 0.0147 | 0.76 |        |
| 2023517a46   | 79-60-6-31  | Line scan | 46.9560 | 5.9316  | 0.4998 | 0.0681 | 0.99 | delete |
|              |             |           |         |         |        |        |      |        |
| 60μm-4J-10Hz | spot        |           |         |         |        |        |      |        |
| 60×1μm10Hz   | line scan   |           |         |         |        |        |      |        |
| 2023515b6    | 79-60-10-01 | spot      | 7.0844  | 1.0690  | 0.0935 | 0.0122 | 0.86 |        |
| 2023515b7    | 79-60-10-02 | spot      | 18.7056 | 3.0254  | 0.1908 | 0.0358 | 0.99 |        |
| 2023515b9    | 79-60-10-04 | spot      | 14.6798 | 2.0136  | 0.1657 | 0.0197 | 0.86 |        |
| 2023515b10   | 79-60-10-05 | spot      | 2.5747  | 0.9513  | 0.0520 | 0.0117 | 0.61 |        |
| 2023515b11   | 79-60-10-06 | spot      | 1.3435  | 0.4579  | 0.0434 | 0.0077 | 0.52 |        |
| 2023515b12   | 79-60-10-07 | spot      | 3.6892  | 1.1482  | 0.0626 | 0.0112 | 0.57 |        |
| 2023515b13   | 79-60-10-08 | spot      | 3.3655  | 0.7312  | 0.0598 | 0.0109 | 0.84 |        |
| 2023515b14   | 79-60-10-09 | spot      | 6.8668  | 2.7501  | 0.0939 | 0.0304 | 0.81 |        |
| 2023515b15   | 79-60-10-10 | spot      | 1.4369  | 0.6106  | 0.0427 | 0.0084 | 0.46 |        |
| 2023515b16   | 79-60-10-11 | spot      | 1.2291  | 0.5695  | 0.0461 | 0.0087 | 0.41 |        |
| 2023515b17   | 79-60-10-12 | spot      | 2.4394  | 0.5790  | 0.0520 | 0.0085 | 0.69 |        |
| 2023515b18   | 79-60-10-13 | spot      | 2.5898  | 1.1034  | 0.0543 | 0.0142 | 0.61 |        |
| 2023515b20   | 79-60-10-15 | spot      | 2.4978  | 0.8526  | 0.0535 | 0.0120 | 0.66 |        |
| 2023515b21   | 79-60-10-16 | spot      | 2.5778  | 0.6840  | 0.0557 | 0.0079 | 0.53 |        |
| 2023515b27   | 79-60-10-17 | spot      | 5.4931  | 0.9842  | 0.0784 | 0.0125 | 0.89 |        |
| 2023515b29   | 79-60-10-19 | spot      | 5.6241  | 1.8800  | 0.0816 | 0.0123 | 0.45 |        |
| 2023515b31   | 79-60-10-21 | spot      | 12.4992 | 1.9633  | 0.1445 | 0.0190 | 0.84 |        |
| 2023515b32   | 79-60-10-22 | spot      | 9.5383  | 1.8020  | 0.1181 | 0.0231 | 0.99 |        |
| 2023515b33   | 79-60-10-23 | spot      | 5.4880  | 0.9460  | 0.0774 | 0.0148 | 0.99 |        |
| 2023515b34   | 79-60-10-24 | spot      | 40.6313 | 4.4001  | 0.3710 | 0.0401 | 1.00 |        |
| 2023515b36   | 79-60-10-26 | spot      | 2.5665  | 0.5937  | 0.0558 | 0.0099 | 0.77 |        |
| 2023515b37   | 79-60-10-27 | spot      | 19.8471 | 2.6059  | 0.2060 | 0.0314 | 0.99 |        |
| 2023515b38   | 79-60-10-28 | spot      | 3.8897  | 1.3741  | 0.0665 | 0.0159 | 0.68 |        |
| 2023515b39   | 79-60-10-29 | spot      | 1.3970  | 1.7766  | 0.0493 | 0.0180 | 0.29 |        |
| 2023515b46   | 79-60-10-31 | spot      | 3.8340  | 0.9222  | 0.0661 | 0.0107 | 0.67 |        |
| 2023515b47   | 79-60-10-32 | spot      | 3.1954  | 0.8979  | 0.0604 | 0.0140 | 0.82 |        |
| 2023515b48   | 79-60-10-33 | spot      | 1.4183  | 0.8634  | 0.0461 | 0.0122 | 0.43 |        |
| 2023515b49   | 79-60-10-34 | spot      | 7.8704  | 1.7305  | 0.1021 | 0.0246 | 0.99 |        |
| 2023515b51   | 79-60-10-36 | Line scan | 1.3781  | 0.4151  | 0.0484 | 0.0084 | 0.57 |        |
| 2023515b52   | 79-60-10-37 | Line scan | 4.1351  | 0.8355  | 0.0694 | 0.0105 | 0.74 |        |
| 2023515b53   | 79-60-10-38 | Line scan | 6.8207  | 1.5180  | 0.0932 | 0.0235 | 0.99 |        |
| 2023515b55   | 79-60-10-40 | Line scan | 2.4580  | 0.5597  | 0.0548 | 0.0089 | 0.72 |        |
| 2023515b19   | 79-60-10-14 | spot      | 53.7407 | 14.2612 | 0.5778 | 0.3107 | 2.03 | delete |
| 2023515b8    | 79-60-10-03 | spot      | 66.5895 | 14.7367 | 0.5638 | 0.0964 | 0.77 | delete |
| 2023515b28   | 79-60-10-18 | spot      | 32.2912 | 3.7630  | 0.3364 | 0.0338 | 0.86 | delete |
| 2023515b40   | 79-60-10-30 | spot      | 21.1195 | 2.3720  | 0.2296 | 0.0267 | 1.03 | delete |
| 2023515b30   | 79-60-10-20 | spot      | 15.0567 | 6.6378  | 0.1573 | 0.0208 | 0.30 | delete |
| 2023515b35   | 79-60-10-25 | spot      | 10.8771 | 2.9671  | 0.1373 | 0.0299 | 0.80 | delete |
| 2023515b54   | 79-60-10-39 | Line scan | 9.6906  | 2.4120  | 0.1260 | 0.0284 | 0.91 | delete |

|              |               |           |          |         |        |        |      |        |
|--------------|---------------|-----------|----------|---------|--------|--------|------|--------|
| 2023515b50   | 79-60-10-35   | spot      | 9.4519   | 3.0483  | 0.1230 | 0.0366 | 0.92 | delete |
|              |               |           |          |         |        |        |      |        |
| 90μm-4J-6Hz  | spot          |           |          |         |        |        |      |        |
| 90×1μm6Hz    | line scan     |           |          |         |        |        |      |        |
| 2023516a6    | 79-90-10-01   | spot      | 2.4469   | 0.3774  | 0.0535 | 0.0053 | 0.63 |        |
| 2023516a7    | 79-90-10-02   | spot      | 2.1521   | 0.2625  | 0.0516 | 0.0040 | 0.62 |        |
| 2023516a8    | 79-90-10-03   | spot      | 1.3825   | 0.2279  | 0.0430 | 0.0039 | 0.55 |        |
| 2023516a9    | 79-90-10-04   | spot      | 1.0870   | 0.2667  | 0.0399 | 0.0034 | 0.35 |        |
| 2023516a10   | 79-90-10-05   | spot      | 1.0787   | 0.2776  | 0.0390 | 0.0040 | 0.40 |        |
| 2023516a11   | 79-90-10-06   | spot      | 1.1296   | 0.2261  | 0.0396 | 0.0035 | 0.43 |        |
| 2023516a12   | 79-90-10-07   | spot      | 2.9649   | 0.4493  | 0.0597 | 0.0062 | 0.68 |        |
| 2023516a13   | 79-90-10-08   | spot      | 1.2206   | 0.2003  | 0.0400 | 0.0035 | 0.54 |        |
| 2023516a14   | 79-90-10-09   | spot      | 3.0405   | 0.3210  | 0.0576 | 0.0047 | 0.76 |        |
| 2023516a15   | 79-90-10-10   | spot      | 1.5916   | 0.3314  | 0.0464 | 0.0050 | 0.51 |        |
| 2023516a16   | 79-90-10-11   | spot      | 2.1004   | 0.3485  | 0.0455 | 0.0045 | 0.60 |        |
| 2023516a17   | 79-90-10-12   | spot      | 4.7611   | 0.8110  | 0.0727 | 0.0068 | 0.55 |        |
| 2023516a18   | 79-90-10-13   | spot      | 2.8313   | 0.4390  | 0.0549 | 0.0059 | 0.69 |        |
| 2023516a19   | 79-90-10-14   | spot      | 0.6200   | 0.2214  | 0.0381 | 0.0056 | 0.41 |        |
| 2023516a20   | 79-90-10-15   | spot      | 2.6295   | 0.3839  | 0.0547 | 0.0065 | 0.81 |        |
| 2023516a26   | 79-90-10-16   | spot      | 2.7620   | 0.7769  | 0.0501 | 0.0084 | 0.59 |        |
| 2023516a27   | 79-90-10-17   | spot      | 2.7447   | 0.4146  | 0.0507 | 0.0063 | 0.82 |        |
| 2023516a28   | 79-90-10-18   | spot      | 20.8322  | 2.9369  | 0.2127 | 0.0262 | 0.87 |        |
| 2023516a29   | 79-90-10-19   | spot      | 21.1539  | 3.4501  | 0.2225 | 0.0345 | 0.95 |        |
| 2023516a31   | 79-90-10-21   | spot      | 4.3219   | 1.0433  | 0.0677 | 0.0138 | 0.84 |        |
| 2023516a34   | 79-90-10-24   | spot      | 0.4941   | 0.1332  | 0.0382 | 0.0032 | 0.30 |        |
| 2023516a35   | 79-90-10-25   | spot      | 1.0027   | 0.1785  | 0.0377 | 0.0036 | 0.54 |        |
| 2023516a36   | 79-90-10-26   | spot      | 0.7230   | 0.1967  | 0.0370 | 0.0038 | 0.38 |        |
| 2023516a37   | 79-90-10-27   | Line scan | 0.4115   | 0.1227  | 0.0347 | 0.0037 | 0.36 |        |
| 2023516a38   | 79-90-10-28   | Line scan | 2.1113   | 0.4833  | 0.0475 | 0.0070 | 0.64 |        |
| 2023516a39   | 79-90-10-29   | Line scan | 1.0030   | 0.2293  | 0.0394 | 0.0042 | 0.46 |        |
| 2023516a40   | 79-90-10-30   | Line scan | 2.4606   | 0.4228  | 0.0538 | 0.0117 | 0.99 |        |
| 2023516a33   | 79-90-10-23   | spot      | 9.1788   | 1.3247  | 0.1960 | 0.0906 | 0.99 | delete |
| 2023516a30   | 79-90-10-20   | spot      | 12.8515  | 2.2793  | 0.1151 | 0.0238 | 0.99 | delete |
| 2023516a32   | 79-90-10-22   | spot      | 6.0801   | 1.1430  | 0.1105 | 0.0190 | 0.91 | delete |
|              |               |           |          |         |        |        |      |        |
| 120μm-3J-5Hz | spot          |           |          |         |        |        |      |        |
| 120×1μm5Hz   | line scan     |           |          |         |        |        |      |        |
| 2023522a5    | 79-120-3-5-01 | spot      | 1.1220   | 0.3565  | 0.0409 | 0.0060 | 0.46 |        |
| 2023522a6    | 79-120-3-5-02 | spot      | 2.1292   | 0.5985  | 0.0452 | 0.0080 | 0.63 |        |
| 2023522a8    | 79-120-3-5-04 | spot      | 0.7009   | 0.2478  | 0.0310 | 0.0044 | 0.40 |        |
| 2023522a9    | 79-120-3-5-05 | spot      | 4.3679   | 0.4752  | 0.0675 | 0.0059 | 0.80 |        |
| 2023522a10   | 79-120-3-5-06 | spot      | 2.1902   | 0.3338  | 0.0494 | 0.0051 | 0.68 |        |
| 2023522a11   | 79-120-3-5-07 | spot      | 10.0142  | 1.4534  | 0.1202 | 0.0169 | 0.97 |        |
| 2023522a12   | 79-120-3-5-08 | spot      | 16.7975  | 2.8271  | 0.1840 | 0.0272 | 0.88 |        |
| 2023522a13   | 79-120-3-5-09 | spot      | 18.3815  | 5.7611  | 0.1880 | 0.0442 | 0.75 |        |
| 2023522a14   | 79-120-3-5-10 | spot      | 1.3912   | 0.3294  | 0.0363 | 0.0057 | 0.66 |        |
| 2023522a15   | 79-120-3-5-11 | spot      | 5.7443   | 1.3974  | 0.0775 | 0.0170 | 0.90 |        |
| 2023522a16   | 79-120-3-5-12 | spot      | 2.0094   | 0.7427  | 0.0441 | 0.0130 | 0.80 |        |
| 2023522a17   | 79-120-3-5-13 | spot      | 5.6653   | 1.3307  | 0.0771 | 0.0139 | 0.77 |        |
| 2023522a18   | 79-120-3-5-14 | spot      | 9.6791   | 1.7380  | 0.1044 | 0.0144 | 0.77 |        |
| 2023522a19   | 79-120-3-5-15 | spot      | 0.8576   | 0.2063  | 0.0290 | 0.0032 | 0.45 |        |
| 2023522a20   | 79-120-3-5-16 | spot      | 4.2271   | 0.4719  | 0.0589 | 0.0068 | 0.99 |        |
| 2023522a21   | 79-120-3-5-17 | spot      | 10.2093  | 1.3215  | 0.1162 | 0.0135 | 0.90 |        |
| 2023522a26   | 79-120-3-5-16 | spot      | 12.0211  | 1.2802  | 0.1335 | 0.0141 | 0.99 |        |
| 2023522a27   | 79-120-3-5-17 | spot      | 2.2232   | 0.5349  | 0.0433 | 0.0077 | 0.74 |        |
| 2023522a28   | 79-120-3-5-18 | spot      | 1.7794   | 0.3525  | 0.0363 | 0.0050 | 0.69 |        |
| 2023522a29   | 79-120-3-5-19 | spot      | 4.3008   | 1.0211  | 0.0632 | 0.0125 | 0.83 |        |
| 2023522a30   | 79-120-3-5-20 | spot      | 112.4904 | 18.6123 | 1.0790 | 0.1639 | 0.92 |        |
| 2023522a31   | 79-120-3-5-21 | spot      | 244.7544 | 39.1460 | 2.2917 | 0.3460 | 0.94 |        |
| 2023522a32   | 79-120-3-5-22 | spot      | 1.6653   | 0.5819  | 0.0388 | 0.0071 | 0.52 |        |
| 2023522a33   | 79-120-3-5-23 | spot      | 3.6096   | 0.5534  | 0.0568 | 0.0071 | 0.82 |        |
| 2023522a34   | 79-120-3-5-24 | spot      | 3.5031   | 0.5526  | 0.0569 | 0.0078 | 0.87 |        |
| 2023522a35   | 79-120-3-5-25 | spot      | 1.7293   | 0.5095  | 0.0385 | 0.0076 | 0.67 |        |

|            |               |           |        |        |        |        |      |        |
|------------|---------------|-----------|--------|--------|--------|--------|------|--------|
| 2023522a36 | 79-120-3-5-26 | spot      | 1.0915 | 0.2256 | 0.0360 | 0.0046 | 0.61 |        |
| 2023522a37 | 79-120-3-5-27 | spot      | 1.6072 | 0.3721 | 0.0425 | 0.0065 | 0.66 |        |
| 2023522a38 | 79-120-3-5-28 | spot      | 0.8854 | 0.2051 | 0.0347 | 0.0039 | 0.49 |        |
| 2023522a39 | 79-120-3-5-29 | spot      | 1.2208 | 0.3628 | 0.0373 | 0.0079 | 0.72 |        |
| 2023522a40 | 79-120-3-5-30 | spot      | 2.7006 | 0.5463 | 0.0539 | 0.0073 | 0.66 |        |
| 2023522a44 | 79-120-3-5-31 | Line scan | 3.2672 | 0.8070 | 0.0598 | 0.0117 | 0.79 |        |
| 2023522a45 | 79-120-3-5-32 | Line scan | 3.3339 | 1.5705 | 0.0592 | 0.0293 | 0.99 |        |
| 2023522a46 | 79-120-3-5-33 | Line scan | 2.3726 | 0.8168 | 0.0485 | 0.0111 | 0.66 |        |
| 2023522a47 | 79-120-3-5-34 | Line scan | 1.8070 | 0.4679 | 0.0468 | 0.0089 | 0.73 |        |
| 2023522a48 | 79-120-3-5-35 | Line scan | 1.2333 | 0.4916 | 0.0409 | 0.0084 | 0.52 |        |
| 2023522a7  | 79-120-3-5-03 | spot      | 8.9708 | 0.9196 | 0.1206 | 0.0126 | 0.99 | delete |
