# Supplementary material for: A new appraisal of ilmenite U–Pb dating method by LA-SF-ICP-MS
Source: Royal Society of Chemistry journal article supplement (doi:10.1039/d3ja00209h), 2023-10-07
Supplement: d3ja00209h3.pdf [file d3ja00209h3.pdf]

Table S-2 U-Pb analytical results of ilmenite sample HG79 calibrated by zircon 91500 in most probable ablation settings.

| Sample No.   |             | Analysis mode | Pb    | Th   | U     |        |        | 207Pb/235U |         | 206Pb/238U |        | rho  | Note   |
|--------------|-------------|---------------|-------|------|-------|--------|--------|------------|---------|------------|--------|------|--------|
|              |             |               |       |      | Total | 232    | 238    |            | Ratio   | 2σ         | Ratio  |      |        |
| 44μm-4J-10Hz | spot        |               | Total | 232  | 238   |        |        | Ratio      | 2σ      | Ratio      | 2σ     |      |        |
| 44×1μm10Hz   | line scan   |               | ppm   | ppm  | ppm   | cps    | counts |            |         |            |        |      |        |
| 2023515A6    | 79-44-10-01 | spot          | 0.07  | 0.00 | 0.18  | 426    | 6.4    | 14.2594    | 5.5588  | 0.1509     | 0.0338 | 0.57 |        |
| 2023515A7    | 79-44-10-02 | spot          | 0.04  | 0.01 | 0.19  | 431    | 6.5    | 5.5516     | 2.0228  | 0.0839     | 0.0224 | 0.73 |        |
| 2023515A8    | 79-44-10-03 | spot          | 0.03  | 0.01 | 0.24  | 555    | 8.3    | 1.2329     | 1.1690  | 0.0492     | 0.0150 | 0.32 |        |
| 2023515A9    | 79-44-10-04 | spot          | 0.09  | 0.03 | 0.25  | 563    | 8.4    | 12.5004    | 2.8493  | 0.1522     | 0.0271 | 0.78 |        |
| 2023515A10   | 79-44-10-05 | spot          | 0.06  | 0.03 | 0.30  | 694    | 10.4   | 3.2698     | 1.1455  | 0.0718     | 0.0204 | 0.81 |        |
| 2023515A11   | 79-44-10-06 | spot          | 0.02  | 0.01 | 0.16  | 359    | 5.4    | 9.0988     | 4.3737  | 0.1153     | 0.0481 | 0.87 |        |
| 2023515A12   | 79-44-10-07 | spot          | 0.10  | 0.09 | 0.11  | 250    | 3.7    | 23.8427    | 5.3505  | 0.2587     | 0.0524 | 0.90 |        |
| 2023515A13   | 79-44-10-08 | spot          | 0.09  | 0.01 | 0.25  | 544    | 8.2    | 11.6945    | 2.5472  | 0.1361     | 0.0247 | 0.83 |        |
| 2023515A14   | 79-44-10-09 | spot          | 0.03  | 0.02 | 0.09  | 185    | 2.8    | 18.1405    | 11.2420 | 0.1769     | 0.0786 | 0.72 |        |
| 2023515A15   | 79-44-10-10 | spot          | 0.06  | 0.01 | 0.20  | 426    | 6.4    | 15.7299    | 5.9823  | 0.1709     | 0.0447 | 0.69 |        |
| 2023515A17   | 79-44-10-12 | spot          | 0.09  | 0.05 | 0.24  | 496    | 7.4    | 13.5256    | 2.9801  | 0.1370     | 0.0358 | 0.99 |        |
| 2023515A18   | 79-44-10-13 | spot          | 0.10  | 0.02 | 0.22  | 452    | 6.8    | 10.9455    | 2.0137  | 0.1305     | 0.0267 | 0.99 |        |
| 2023515A19   | 79-44-10-14 | spot          | 0.04  | 0.02 | 0.12  | 247    | 3.7    | 13.8017    | 8.6353  | 0.1618     | 0.1034 | 0.99 |        |
| 2023515A20   | 79-44-10-15 | spot          | 0.09  | 0.02 | 0.27  | 549    | 8.2    | 13.5130    | 3.8299  | 0.1611     | 0.0351 | 0.77 |        |
| 2023515A26   | 79-44-10-16 | spot          | 0.05  | 0.03 | 0.16  | 308    | 4.6    | 9.1211     | 3.0405  | 0.1115     | 0.0246 | 0.66 |        |
| 2023515A27   | 79-44-10-17 | spot          | 0.07  | 0.03 | 0.17  | 337    | 5.1    | 14.9534    | 4.2340  | 0.1645     | 0.0415 | 0.89 |        |
| 2023515A28   | 79-44-10-18 | spot          | 0.03  | 0.00 | 0.14  | 275    | 4.1    | 17.2672    | 10.0754 | 0.1752     | 0.0910 | 0.89 |        |
| 2023515A29   | 79-44-10-19 | spot          | 0.05  | 0.00 | 0.12  | 242    | 3.6    | 15.5589    | 6.2268  | 0.1632     | 0.0475 | 0.73 |        |
| 2023515A30   | 79-44-10-20 | spot          | 0.10  | 0.01 | 0.19  | 364    | 5.5    | 22.8927    | 5.7804  | 0.2569     | 0.0834 | 0.99 |        |
| 2023515A31   | 79-44-10-21 | spot          | 0.05  | 0.02 | 0.28  | 545    | 8.2    | 4.9592     | 2.6578  | 0.0830     | 0.0194 | 0.44 |        |
| 2023515A32   | 79-44-10-22 | spot          | 0.04  | 0.03 | 0.31  | 580    | 8.7    | 5.2369     | 2.2096  | 0.0794     | 0.0216 | 0.64 |        |
| 2023515A33   | 79-44-10-23 | spot          | 0.05  | 0.01 | 0.33  | 637    | 9.6    | 2.8788     | 0.9452  | 0.0626     | 0.0118 | 0.57 |        |
| 2023515A34   | 79-44-10-24 | spot          | 0.40  | 0.19 | 0.31  | 587    | 8.8    | 44.4454    | 10.1545 | 0.4356     | 0.0858 | 0.86 |        |
| 2023515A35   | 79-44-10-25 | spot          | 0.04  | 0.00 | 0.10  | 191    | 2.9    | 26.2685    | 15.0771 | 0.2900     | 0.1935 | 0.99 |        |
| 2023515A36   | 79-44-10-26 | spot          | 0.07  | 0.01 | 0.24  | 441    | 6.6    | 9.2058     | 2.4407  | 0.1184     | 0.0229 | 0.73 |        |
| 2023515A38   | 79-44-10-28 | spot          | 0.03  | 0.04 | 0.45  | 856    | 12.8   | 2.9859     | 0.8731  | 0.0641     | 0.0146 | 0.78 |        |
| 2023515A39   | 79-44-10-29 | spot          | 0.03  | 0.03 | 0.28  | 517    | 7.8    | 3.6403     | 1.5635  | 0.0673     | 0.0149 | 0.51 |        |
| 2023515A46   | 79-44-10-31 | spot          | 0.02  | 0.04 | 0.06  | 103    | 1.5    | 19.2743    | 11.3619 | 0.2157     | 0.1591 | 0.99 |        |
| 2023515A47   | 79-44-10-32 | spot          | 0.06  | 0.01 | 0.49  | 871    | 13.1   | 0.8433     | 0.6981  | 0.0473     | 0.0085 | 0.22 |        |
| 2023515A48   | 79-44-10-33 | spot          | 0.02  | 0.01 | 0.27  | 490    | 7.3    | 3.1653     | 0.9014  | 0.0665     | 0.0181 | 0.95 |        |
| 2023515A49   | 79-44-10-34 | spot          | 0.04  | 0.00 | 0.67  | 1163   | 17.4   | 1.8835     | 0.6880  | 0.0523     | 0.0101 | 0.53 |        |
| 2023515A50   | 79-44-10-35 | spot          | 0.16  | 0.28 | 0.15  | 279    | 4.2    | 20.3401    | 3.8127  | 0.2210     | 0.0443 | 0.99 |        |
| 2023515A51   | 79-44-10-36 | Line scan     | 0.20  | 0.03 | 0.56  | 1010   | 15.1   | 7.9979     | 1.2844  | 0.1070     | 0.0141 | 0.82 |        |
| 2023515A52   | 79-44-10-37 | Line scan     | 0.03  | 0.01 | 0.06  | 109    | 1.6    | 36.1298    | 17.9489 | 0.2973     | 0.1417 | 0.96 |        |
| 2023515A53   | 79-44-10-38 | Line scan     | 0.04  | 0.01 | 0.48  | 858    | 12.9   | 2.5289     | 0.5480  | 0.0605     | 0.0098 | 0.75 |        |
| 2023515A54   | 79-44-10-39 | Line scan     | 0.06  | 0.01 | 0.78  | 1391   | 20.9   | 1.8212     | 0.5257  | 0.0528     | 0.0061 | 0.40 |        |
| 2023515A37   | 79-44-10-27 | spot          | 0.08  | 0.01 | 0.16  | 310    | 4.6    | 26.3979    | 28.0232 | 0.2250     | 0.0584 | 0.24 | delete |
| 2023515A40   | 79-44-10-30 | spot          | 26.63 | 0.01 | 66.12 | 122914 | #####  | 5.6542     | 0.1841  | 0.3811     | 0.0126 | 0.99 | delete |
| 2023515A16   | 79-44-10-11 | spot          | 0.08  | 0.07 | 0.06  | 125    | 1.9    | 47.8141    | 16.6071 | 0.5659     | 0.1848 | 0.94 | delete |
|              |             |               |       |      |       |        |        |            |         |            |        |      |        |
| 60μm-4J-6Hz  | spot        |               |       |      |       |        |        |            |         |            |        |      |        |
| 60×1μm6Hz    | line scan   |               |       |      |       |        |        |            |         |            |        |      |        |
| 2023517a6    | 79-60-6-01  | spot          | 0.05  | 0.03 | 0.04  | 348    | 5.2    | 43.2565    | 6.4095  | 0.4154     | 0.0612 | 0.99 |        |
| 2023517a7    | 79-60-6-02  | spot          | 0.02  | 0.02 | 0.07  | 553    | 8.3    | 8.8583     | 2.0911  | 0.1177     | 0.0203 | 0.73 |        |
| 2023517a8    | 79-60-6-03  | spot          | 0.01  | 0.02 | 0.10  | 796    | 11.9   | 2.3497     | 0.7617  | 0.0551     | 0.0099 | 0.55 |        |
| 2023517a9    | 79-60-6-04  | spot          | 0.02  | 0.05 | 0.10  | 782    | 11.7   | 5.2017     | 1.1443  | 0.0837     | 0.0138 | 0.75 |        |
| 2023517a10   | 79-60-6-05  | spot          | 0.02  | 0.06 | 0.12  | 957    | 14.4   | 3.7459     | 0.8515  | 0.0665     | 0.0099 | 0.66 |        |
| 2023517a11   | 79-60-6-06  | spot          | 0.04  | 0.14 | 0.16  | 1200   | 18.0   | 6.8594     | 1.0736  | 0.1039     | 0.0135 | 0.83 |        |
| 2023517a12   | 79-60-6-07  | spot          | 0.03  | 0.07 | 0.15  | 1150   | 17.2   | 4.4418     | 0.8964  | 0.0728     | 0.0115 | 0.78 |        |
| 2023517a13   | 79-60-6-08  | spot          | 0.02  | 0.15 | 0.14  | 1055   | 15.8   | 3.6565     | 0.9250  | 0.0703     | 0.0117 | 0.66 |        |
| 2023517a14   | 79-60-6-09  | spot          | 0.01  | 0.02 | 0.06  | 467    | 7.0    | 6.5766     | 1.7736  | 0.0941     | 0.0191 | 0.75 |        |
| 2023517a15   | 79-60-6-10  | spot          | 0.02  | 0.05 | 0.09  | 627    | 9.4    | 4.1745     | 1.2794  | 0.0790     | 0.0149 | 0.62 |        |
| 2023517a16   | 79-60-6-11  | spot          | 0.02  | 0.06 | 0.15  | 1110   | 16.6   | 2.7656     | 0.5860  | 0.0648     | 0.0102 | 0.74 |        |
| 2023517a17   | 79-60-6-12  | spot          | 0.04  | 0.01 | 0.06  | 476    | 7.1    | 20.0663    | 2.7914  | 0.2076     | 0.0288 | 1.00 |        |
| 2023517a18   | 79-60-6-13  | spot          | 0.01  | 0.06 | 0.07  | 535    | 8.0    | 4.0895     | 1.0945  | 0.0720     | 0.0124 | 0.64 |        |
| 2023517a19   | 79-60-6-14  | spot          | 0.02  | 0.05 | 0.07  | 513    | 7.7    | 7.2552     | 1.6735  | 0.1041     | 0.0185 | 0.77 |        |
| 2023517a20   | 79-60-6-15  | spot          | 0.02  | 0.08 | 0.19  | 1393   | 20.9   | 1.9969     | 0.7287  | 0.0549     | 0.0078 | 0.39 |        |
| 2023517a26   | 79-60-6-16  | spot          | 0.05  | 0.87 | 0.43  | 3106   | 46.6   | 2.0665     | 0.3676  | 0.0524     | 0.0047 | 0.50 |        |

|              |             |           |      |      |      |      |      |         |         |        |        |      |        |
|--------------|-------------|-----------|------|------|------|------|------|---------|---------|--------|--------|------|--------|
| 2023517a27   | 79-60-6-17  | spot      | 0.03 | 0.02 | 0.09 | 671  | 10.1 | 6.1604  | 1.3874  | 0.0904 | 0.0149 | 0.73 |        |
| 2023517a28   | 79-60-6-18  | spot      | 0.02 | 0.02 | 0.16 | 1154 | 17.3 | 1.4608  | 0.5041  | 0.0501 | 0.0069 | 0.40 |        |
| 2023517a29   | 79-60-6-19  | spot      | 0.02 | 0.25 | 0.18 | 1260 | 18.9 | 2.5504  | 0.6508  | 0.0583 | 0.0087 | 0.58 |        |
| 2023517a30   | 79-60-6-20  | spot      | 0.02 | 0.08 | 0.16 | 1130 | 17.0 | 2.8089  | 0.6234  | 0.0598 | 0.0076 | 0.57 |        |
| 2023517a31   | 79-60-6-21  | spot      | 0.01 | 0.03 | 0.10 | 660  | 9.9  | 3.4592  | 1.3539  | 0.0658 | 0.0135 | 0.52 |        |
| 2023517a32   | 79-60-6-22  | spot      | 0.01 | 0.04 | 0.09 | 600  | 9.0  | 3.2049  | 0.9463  | 0.0689 | 0.0225 | 0.99 |        |
| 2023517a33   | 79-60-6-23  | spot      | 0.05 | 0.14 | 0.13 | 939  | 14.1 | 10.8445 | 2.0378  | 0.1358 | 0.0201 | 0.78 |        |
| 2023517a34   | 79-60-6-24  | spot      | 0.02 | 0.06 | 0.13 | 905  | 13.6 | 2.5810  | 0.8100  | 0.0579 | 0.0101 | 0.55 |        |
| 2023517a35   | 79-60-6-25  | spot      | 0.05 | 0.16 | 0.14 | 980  | 14.7 | 4.7495  | 1.0468  | 0.0806 | 0.0110 | 0.62 |        |
| 2023517a36   | 79-60-6-26  | spot      | 0.01 | 0.03 | 0.14 | 974  | 14.6 | 1.0995  | 0.5008  | 0.0493 | 0.0087 | 0.39 |        |
| 2023517a37   | 79-60-6-27  | spot      | 0.03 | 0.13 | 0.09 | 623  | 9.3  | 9.2152  | 1.7164  | 0.1200 | 0.0199 | 0.89 |        |
| 2023517a38   | 79-60-6-28  | spot      | 0.01 | 0.12 | 0.10 | 694  | 10.4 | 3.6453  | 0.9069  | 0.0699 | 0.0152 | 0.87 |        |
| 2023517a39   | 79-60-6-29  | spot      | 0.02 | 0.02 | 0.24 | 1666 | 25.0 | 1.1801  | 0.4137  | 0.0489 | 0.0065 | 0.38 |        |
| 2023517a40   | 79-60-6-30  | spot      | 0.06 | 0.19 | 0.10 | 681  | 10.2 | 15.2067 | 2.3170  | 0.1783 | 0.0241 | 0.88 |        |
| 2023517a47   | 79-60-6-32  | Line scan | 0.02 | 0.00 | 0.16 | 1102 | 16.5 | 2.2032  | 0.5544  | 0.0521 | 0.0079 | 0.60 |        |
| 2023517a48   | 79-60-6-33  | Line scan | 0.03 | 0.00 | 0.09 | 604  | 9.1  | 5.7283  | 1.0854  | 0.0895 | 0.0153 | 0.90 |        |
| 2023517a49   | 79-60-6-34  | Line scan | 0.02 | 0.00 | 0.13 | 833  | 12.5 | 3.0541  | 0.6884  | 0.0650 | 0.0108 | 0.73 |        |
| 2023517a50   | 79-60-6-35  | Line scan | 0.01 | 0.00 | 0.06 | 390  | 5.9  | 3.1615  | 1.1794  | 0.0625 | 0.0161 | 0.69 |        |
| 2023517a51   | 79-60-6-36  | Line scan | 0.03 | 0.02 | 0.21 | 1420 | 21.3 | 1.4507  | 0.4396  | 0.0496 | 0.0069 | 0.46 |        |
| 2023517a52   | 79-60-6-37  | Line scan | 0.03 | 0.00 | 0.11 | 709  | 10.6 | 7.4163  | 1.5546  | 0.1047 | 0.0168 | 0.77 |        |
| 2023517a46   | 79-60-6-31  | Line scan | 0.14 | 0.07 | 0.08 | 514  | 7.7  | 57.1981 | 6.6311  | 0.6028 | 0.0803 | 1.15 | delete |
| 60μm-4J-10Hz | spot        |           |      |      |      |      |      |         |         |        |        |      |        |
| 60×1μm10Hz   | line scan   |           |      |      |      |      |      |         |         |        |        |      |        |
| 2023515b6    | 79-60-10-01 | spot      | 0.06 | 0.04 | 0.20 | 1057 | 15.9 | 8.7816  | 1.2709  | 0.1134 | 0.0148 | 0.90 |        |
| 2023515b7    | 79-60-10-02 | spot      | 0.09 | 0.02 | 0.11 | 585  | 8.8  | 23.1733 | 3.6159  | 0.2311 | 0.0433 | 0.99 |        |
| 2023515b9    | 79-60-10-04 | spot      | 0.11 | 0.11 | 0.20 | 1048 | 15.7 | 18.1650 | 2.3698  | 0.2004 | 0.0238 | 0.91 |        |
| 2023515b10   | 79-60-10-05 | spot      | 0.01 | 0.04 | 0.15 | 758  | 11.4 | 3.1841  | 1.1687  | 0.0628 | 0.0141 | 0.61 |        |
| 2023515b11   | 79-60-10-06 | spot      | 0.02 | 0.16 | 0.23 | 1213 | 18.2 | 1.6606  | 0.5615  | 0.0524 | 0.0093 | 0.52 |        |
| 2023515b12   | 79-60-10-07 | spot      | 0.02 | 0.04 | 0.14 | 755  | 11.3 | 4.5572  | 1.4051  | 0.0756 | 0.0134 | 0.58 |        |
| 2023515b13   | 79-60-10-08 | spot      | 0.03 | 0.04 | 0.17 | 904  | 13.6 | 4.1551  | 0.8852  | 0.0721 | 0.0131 | 0.85 |        |
| 2023515b14   | 79-60-10-09 | spot      | 0.02 | 0.01 | 0.08 | 412  | 6.2  | 8.4731  | 3.3740  | 0.1131 | 0.0366 | 0.81 |        |
| 2023515b15   | 79-60-10-10 | spot      | 0.01 | 0.00 | 0.26 | 1359 | 20.4 | 1.7721  | 0.7492  | 0.0514 | 0.0102 | 0.47 |        |
| 2023515b16   | 79-60-10-11 | spot      | 0.02 | 0.01 | 0.23 | 1207 | 18.1 | 1.5149  | 0.6988  | 0.0555 | 0.0105 | 0.41 |        |
| 2023515b17   | 79-60-10-12 | spot      | 0.02 | 0.01 | 0.21 | 1089 | 16.3 | 3.0051  | 0.7012  | 0.0624 | 0.0102 | 0.70 |        |
| 2023515b18   | 79-60-10-13 | spot      | 0.01 | 0.03 | 0.12 | 599  | 9.0  | 3.1885  | 1.3513  | 0.0651 | 0.0171 | 0.62 |        |
| 2023515b20   | 79-60-10-15 | spot      | 0.02 | 0.01 | 0.21 | 1067 | 16.0 | 3.0720  | 1.0397  | 0.0641 | 0.0143 | 0.66 |        |
| 2023515b21   | 79-60-10-16 | spot      | 0.03 | 0.02 | 0.21 | 1095 | 16.4 | 3.1686  | 0.8286  | 0.0667 | 0.0094 | 0.54 |        |
| 2023515b27   | 79-60-10-17 | spot      | 0.05 | 0.01 | 0.18 | 934  | 14.0 | 6.6871  | 1.1612  | 0.0934 | 0.0149 | 0.91 |        |
| 2023515b29   | 79-60-10-19 | spot      | 0.05 | 0.02 | 0.21 | 1108 | 16.6 | 6.8076  | 2.2564  | 0.0969 | 0.0146 | 0.45 |        |
| 2023515b31   | 79-60-10-21 | spot      | 0.07 | 0.04 | 0.15 | 764  | 11.5 | 15.0442 | 2.2741  | 0.1712 | 0.0225 | 0.87 |        |
| 2023515b32   | 79-60-10-22 | spot      | 0.04 | 0.07 | 0.10 | 540  | 8.1  | 11.4483 | 2.1075  | 0.1398 | 0.0273 | 0.99 |        |
| 2023515b33   | 79-60-10-23 | spot      | 0.03 | 0.01 | 0.19 | 1005 | 15.1 | 6.5686  | 1.0978  | 0.0916 | 0.0175 | 0.99 |        |
| 2023515b34   | 79-60-10-24 | spot      | 0.22 | 0.08 | 0.14 | 708  | 10.6 | 48.4969 | 4.8389  | 0.4381 | 0.0472 | 0.99 |        |
| 2023515b36   | 79-60-10-26 | spot      | 0.03 | 0.02 | 0.19 | 958  | 14.4 | 3.0465  | 0.6931  | 0.0657 | 0.0117 | 0.78 |        |
| 2023515b37   | 79-60-10-27 | spot      | 0.15 | 0.02 | 0.11 | 640  | 9.6  | 23.4948 | 2.9236  | 0.2424 | 0.0368 | 0.99 |        |
| 2023515b38   | 79-60-10-28 | spot      | 0.01 | 0.08 | 0.12 | 657  | 9.9  | 4.5921  | 1.6108  | 0.0782 | 0.0187 | 0.68 |        |
| 2023515b39   | 79-60-10-29 | spot      | 0.02 | 0.03 | 0.14 | 747  | 11.2 | 2.8518  | 2.2828  | 0.0606 | 0.0209 | 0.43 |        |
| 2023515b46   | 79-60-10-31 | spot      | 0.02 | 0.03 | 0.17 | 922  | 13.8 | 4.4997  | 1.0660  | 0.0776 | 0.0125 | 0.68 |        |
| 2023515b47   | 79-60-10-32 | spot      | 0.02 | 0.01 | 0.20 | 1010 | 15.2 | 3.7502  | 1.0422  | 0.0709 | 0.0164 | 0.83 |        |
| 2023515b48   | 79-60-10-33 | spot      | 0.01 | 0.07 | 0.17 | 854  | 12.8 | 1.6646  | 1.0110  | 0.0541 | 0.0143 | 0.43 |        |
| 2023515b49   | 79-60-10-34 | spot      | 0.04 | 0.01 | 0.14 | 710  | 10.7 | 9.2369  | 1.9944  | 0.1198 | 0.0289 | 0.99 |        |
| 2023515b51   | 79-60-10-36 | Line scan | 0.01 | 0.11 | 0.22 | 1144 | 17.2 | 1.6174  | 0.4825  | 0.0567 | 0.0098 | 0.58 |        |
| 2023515b52   | 79-60-10-37 | Line scan | 0.03 | 0.01 | 0.16 | 871  | 13.1 | 4.8531  | 0.9594  | 0.0814 | 0.0122 | 0.76 |        |
| 2023515b53   | 79-60-10-38 | Line scan | 0.03 | 0.02 | 0.11 | 577  | 8.7  | 8.0049  | 1.7499  | 0.1094 | 0.0275 | 0.99 |        |
| 2023515b55   | 79-60-10-40 | Line scan | 0.02 | 0.01 | 0.24 | 1307 | 19.6 | 2.8848  | 0.6456  | 0.0643 | 0.0105 | 0.73 |        |
| 2023515b19   | 79-60-10-14 | spot      | 0.05 | 0.01 | 0.03 | 167  | 2.5  | 66.1298 | 17.3045 | 0.6931 | 0.3726 | 0.99 | delete |
| 2023515b8    | 79-60-10-03 | spot      | 0.15 | 0.02 | 0.07 | 346  | 5.2  | 82.4460 | 17.9072 | 0.6824 | 0.1165 | 0.79 | delete |
| 2023515b28   | 79-60-10-18 | spot      | 0.17 | 0.06 | 0.13 | 687  | 10.3 | 39.1976 | 4.2343  | 0.4003 | 0.0400 | 0.92 | delete |
| 2023515b40   | 79-60-10-30 | spot      | 0.12 | 0.01 | 0.16 | 829  | 12.4 | 24.7989 | 2.5825  | 0.2692 | 0.0311 | 0.99 | delete |
| 2023515b30   | 79-60-10-20 | spot      | 0.06 | 0.03 | 0.11 | 543  | 8.1  | 18.1736 | 7.9737  | 0.1867 | 0.0246 | 0.30 | delete |
| 2023515b35   | 79-60-10-25 | spot      | 0.03 | 0.12 | 0.08 | 457  | 6.9  | 12.9470 | 3.4897  | 0.1620 | 0.0352 | 0.81 | delete |
| 2023515b54   | 79-60-10-39 | Line scan | 0.04 | 0.02 | 0.13 | 691  | 10.4 | 11.3732 | 2.7903  | 0.1479 | 0.0333 | 0.92 | delete |

|              |               |           |      |      |      |      |      |          |         |        |        |      |        |
|--------------|---------------|-----------|------|------|------|------|------|----------|---------|--------|--------|------|--------|
| 2023515b50   | 79-60-10-35   | spot      | 0.05 | 0.06 | 0.08 | 434  | 6.5  | 11.0930  | 3.5477  | 0.1443 | 0.0429 | 0.93 | delete |
| 90µm-4J-6Hz  | spot          |           |      |      |      |      |      |          |         |        |        |      |        |
| 90×1µm6Hz    | line scan     |           |      |      |      |      |      |          |         |        |        |      |        |
| 2023516a6    | 79-90-10-01   | spot      | 0.03 | 0.19 | 0.19 | 2894 | 43.4 | 3.2734   | 0.4862  | 0.0672 | 0.0066 | 0.66 |        |
| 2023516a7    | 79-90-10-02   | spot      | 0.03 | 0.18 | 0.25 | 3822 | 57.3 | 2.8767   | 0.3299  | 0.0649 | 0.0050 | 0.66 |        |
| 2023516a8    | 79-90-10-03   | spot      | 0.02 | 0.10 | 0.19 | 2896 | 43.4 | 1.8465   | 0.2945  | 0.0541 | 0.0050 | 0.57 |        |
| 2023516a9    | 79-90-10-04   | spot      | 0.02 | 0.16 | 0.25 | 3630 | 54.5 | 1.4507   | 0.3508  | 0.0503 | 0.0043 | 0.35 |        |
| 2023516a10   | 79-90-10-05   | spot      | 0.01 | 0.09 | 0.20 | 2929 | 43.9 | 1.4384   | 0.3653  | 0.0492 | 0.0051 | 0.40 |        |
| 2023516a11   | 79-90-10-06   | spot      | 0.02 | 0.15 | 0.22 | 3143 | 47.1 | 1.5050   | 0.2947  | 0.0500 | 0.0044 | 0.44 |        |
| 2023516a12   | 79-90-10-07   | spot      | 0.03 | 0.12 | 0.17 | 2475 | 37.1 | 3.9469   | 0.5751  | 0.0755 | 0.0078 | 0.71 |        |
| 2023516a13   | 79-90-10-08   | spot      | 0.02 | 0.17 | 0.24 | 3489 | 52.3 | 1.6235   | 0.2577  | 0.0506 | 0.0045 | 0.55 |        |
| 2023516a14   | 79-90-10-09   | spot      | 0.04 | 0.25 | 0.22 | 3156 | 47.3 | 4.0407   | 0.3918  | 0.0730 | 0.0059 | 0.83 |        |
| 2023516a15   | 79-90-10-10   | spot      | 0.03 | 0.07 | 0.19 | 2738 | 41.1 | 2.1134   | 0.4311  | 0.0589 | 0.0063 | 0.52 |        |
| 2023516a16   | 79-90-10-11   | spot      | 0.02 | 0.09 | 0.20 | 2745 | 41.2 | 2.7865   | 0.4473  | 0.0578 | 0.0057 | 0.61 |        |
| 2023516a17   | 79-90-10-12   | spot      | 0.04 | 0.10 | 0.15 | 2041 | 30.6 | 6.3109   | 1.0415  | 0.0924 | 0.0086 | 0.56 |        |
| 2023516a18   | 79-90-10-13   | spot      | 0.03 | 0.17 | 0.17 | 2324 | 34.9 | 3.7497   | 0.5592  | 0.0700 | 0.0075 | 0.71 |        |
| 2023516a19   | 79-90-10-14   | spot      | 0.02 | 0.01 | 0.30 | 4228 | 63.4 | 0.8204   | 0.2908  | 0.0486 | 0.0071 | 0.41 |        |
| 2023516a20   | 79-90-10-15   | spot      | 0.02 | 0.02 | 0.12 | 1686 | 25.3 | 3.4760   | 0.4850  | 0.0699 | 0.0082 | 0.84 |        |
| 2023516a26   | 79-90-10-16   | spot      | 0.01 | 0.01 | 0.09 | 1213 | 18.2 | 3.6307   | 1.0094  | 0.0630 | 0.0105 | 0.60 |        |
| 2023516a27   | 79-90-10-17   | spot      | 0.02 | 0.01 | 0.11 | 1519 | 22.8 | 3.6265   | 0.5256  | 0.0638 | 0.0079 | 0.85 |        |
| 2023516a28   | 79-90-10-18   | spot      | 0.04 | 0.01 | 0.05 | 623  | 9.3  | 27.6653  | 3.7191  | 0.2678 | 0.0329 | 0.91 |        |
| 2023516a29   | 79-90-10-19   | spot      | 0.05 | 0.00 | 0.05 | 659  | 9.9  | 28.2360  | 4.4470  | 0.2803 | 0.0434 | 0.98 |        |
| 2023516a31   | 79-90-10-21   | spot      | 0.01 | 0.00 | 0.04 | 535  | 8.0  | 5.8278   | 1.3851  | 0.0853 | 0.0174 | 0.86 |        |
| 2023516a34   | 79-90-10-24   | spot      | 0.02 | 0.05 | 0.29 | 3935 | 59.0 | 0.6764   | 0.1801  | 0.0482 | 0.0040 | 0.31 |        |
| 2023516a35   | 79-90-10-25   | spot      | 0.02 | 0.10 | 0.25 | 3400 | 51.0 | 1.3797   | 0.2386  | 0.0476 | 0.0046 | 0.55 |        |
| 2023516a36   | 79-90-10-26   | spot      | 0.02 | 0.05 | 0.24 | 3314 | 49.7 | 0.9998   | 0.2687  | 0.0468 | 0.0048 | 0.38 |        |
| 2023516a37   | 79-90-10-27   | Line scan | 0.02 | 0.05 | 0.27 | 3636 | 54.5 | 0.5719   | 0.1688  | 0.0438 | 0.0047 | 0.36 |        |
| 2023516a38   | 79-90-10-28   | Line scan | 0.01 | 0.08 | 0.11 | 1472 | 22.1 | 2.9490   | 0.6633  | 0.0601 | 0.0089 | 0.65 |        |
| 2023516a39   | 79-90-10-29   | Line scan | 0.02 | 0.15 | 0.20 | 2688 | 40.3 | 1.4081   | 0.3161  | 0.0498 | 0.0052 | 0.47 |        |
| 2023516a40   | 79-90-10-30   | Line scan | 0.02 | 0.22 | 0.15 | 1938 | 29.1 | 3.4714   | 0.5774  | 0.0681 | 0.0149 | 0.99 |        |
| 2023516a33   | 79-90-10-23   | spot      | 0.03 | 0.00 | 0.05 | 652  | 9.8  | 12.5028  | 1.7254  | 0.2474 | 0.1143 | 0.99 | delete |
| 2023516a30   | 79-90-10-20   | spot      | 0.02 | 0.00 | 0.04 | 517  | 7.8  | 17.2415  | 2.9697  | 0.1450 | 0.0299 | 0.99 | delete |
| 2023516a32   | 79-90-10-22   | spot      | 0.02 | 0.00 | 0.05 | 622  | 9.3  | 8.2401   | 1.5095  | 0.1394 | 0.0239 | 0.94 | delete |
|              |               |           |      |      |      |      |      |          |         |        |        |      |        |
| 120µm-3J-5Hz | spot          |           |      |      |      |      |      |          |         |        |        |      |        |
| 120×1µm5Hz   | line scan     |           |      |      |      |      |      |          |         |        |        |      |        |
| 2023522a5    | 79-120-3-5-01 | spot      | 0.01 | 0.09 | 0.09 | 1364 | 20.5 | 1.6282   | 0.5103  | 0.0518 | 0.0075 | 0.46 |        |
| 2023522a6    | 79-120-3-5-02 | spot      | 0.01 | 0.05 | 0.04 | 649  | 9.7  | 3.1352   | 0.8661  | 0.0584 | 0.0102 | 0.63 |        |
| 2023522a7    | 79-120-3-5-03 | spot      | 0.05 | 0.05 | 0.09 | 1436 | 21.5 | 13.4039  | 1.1906  | 0.1589 | 0.0162 | 0.99 |        |
| 2023522a8    | 79-120-3-5-04 | spot      | 0.01 | 0.02 | 0.15 | 2228 | 33.4 | 1.0628   | 0.3718  | 0.0418 | 0.0058 | 0.39 |        |
| 2023522a9    | 79-120-3-5-05 | spot      | 0.05 | 0.23 | 0.15 | 2384 | 35.8 | 6.7211   | 0.6479  | 0.0926 | 0.0078 | 0.87 |        |
| 2023522a10   | 79-120-3-5-06 | spot      | 0.02 | 0.11 | 0.14 | 2136 | 32.0 | 3.4204   | 0.4920  | 0.0693 | 0.0070 | 0.70 |        |
| 2023522a11   | 79-120-3-5-07 | spot      | 0.03 | 0.02 | 0.06 | 935  | 14.0 | 15.8736  | 2.1599  | 0.1722 | 0.0239 | 0.99 |        |
| 2023522a12   | 79-120-3-5-08 | spot      | 0.26 | 0.01 | 0.26 | 4114 | 61.7 | 27.0264  | 4.3366  | 0.2694 | 0.0392 | 0.91 |        |
| 2023522a13   | 79-120-3-5-09 | spot      | 0.01 | 0.01 | 0.01 | 227  | 3.4  | 30.0221  | 9.2824  | 0.2812 | 0.0656 | 0.75 |        |
| 2023522a14   | 79-120-3-5-10 | spot      | 0.01 | 0.01 | 0.08 | 1212 | 18.2 | 2.3067   | 0.5328  | 0.0556 | 0.0085 | 0.66 |        |
| 2023522a15   | 79-120-3-5-11 | spot      | 0.01 | 0.03 | 0.03 | 410  | 6.2  | 9.6699   | 2.2957  | 0.1213 | 0.0263 | 0.91 |        |
| 2023522a16   | 79-120-3-5-12 | spot      | 0.01 | 0.00 | 0.03 | 500  | 7.5  | 3.4345   | 1.2557  | 0.0706 | 0.0206 | 0.80 |        |
| 2023522a17   | 79-120-3-5-13 | spot      | 0.01 | 0.01 | 0.03 | 535  | 8.0  | 9.8328   | 2.2435  | 0.1262 | 0.0223 | 0.77 |        |
| 2023522a18   | 79-120-3-5-14 | spot      | 0.02 | 0.00 | 0.04 | 624  | 9.4  | 17.0598  | 2.9018  | 0.1749 | 0.0230 | 0.77 |        |
| 2023522a19   | 79-120-3-5-15 | spot      | 0.02 | 0.01 | 0.17 | 2719 | 40.8 | 1.5351   | 0.3578  | 0.0498 | 0.0050 | 0.42 |        |
| 2023522a20   | 79-120-3-5-16 | spot      | 0.03 | 0.03 | 0.10 | 1582 | 23.7 | 7.6854   | 0.7152  | 0.1035 | 0.0109 | 0.99 |        |
| 2023522a26   | 79-120-3-5-16 | spot      | 0.06 | 0.07 | 0.08 | 1226 | 18.4 | 21.7615  | 1.9136  | 0.2365 | 0.0225 | 0.99 |        |
| 2023522a21   | 79-120-3-5-17 | spot      | 0.04 | 0.02 | 0.07 | 1026 | 15.4 | 18.8545  | 2.1211  | 0.2091 | 0.0218 | 0.92 |        |
| 2023522a27   | 79-120-3-5-17 | spot      | 0.01 | 0.01 | 0.06 | 903  | 13.5 | 3.9552   | 0.9240  | 0.0750 | 0.0130 | 0.74 |        |
| 2023522a28   | 79-120-3-5-18 | spot      | 0.01 | 0.01 | 0.07 | 1201 | 18.0 | 3.1121   | 0.5921  | 0.0616 | 0.0081 | 0.69 |        |
| 2023522a29   | 79-120-3-5-19 | spot      | 0.01 | 0.01 | 0.03 | 454  | 6.8  | 7.3972   | 1.7114  | 0.1050 | 0.0204 | 0.84 |        |
| 2023522a30   | 79-120-3-5-20 | spot      | 0.23 | 0.03 | 0.04 | 654  | 9.8  | 190.3256 | 29.9275 | 1.7567 | 0.2606 | 0.94 |        |
| 2023522a31   | 79-120-3-5-21 | spot      | 0.68 | 0.01 | 0.06 | 1021 | 15.3 | 407.4811 | 61.9140 | 3.6574 | 0.5412 | 0.97 |        |
| 2023522a32   | 79-120-3-5-22 | spot      | 0.00 | 0.00 | 0.05 | 749  | 11.2 | 2.7289   | 0.9443  | 0.0607 | 0.0110 | 0.52 |        |
| 2023522a33   | 79-120-3-5-23 | spot      | 0.03 | 0.01 | 0.10 | 1597 | 24.0 | 5.8237   | 0.8488  | 0.0873 | 0.0107 | 0.84 |        |
| 2023522a34   | 79-120-3-5-24 | spot      | 0.01 | 0.01 | 0.07 | 1089 | 16.3 | 5.5661   | 0.8386  | 0.0857 | 0.0116 | 0.90 |        |

|            |               |           |      |      |      |      |      |        |        |        |        |      |  |
|------------|---------------|-----------|------|------|------|------|------|--------|--------|--------|--------|------|--|
| 2023522a35 | 79-120-3-5-25 | spot      | 0.03 | 0.01 | 0.14 | 2283 | 34.2 | 2.7067 | 0.7878 | 0.0570 | 0.0112 | 0.67 |  |
| 2023522a36 | 79-120-3-5-26 | spot      | 0.01 | 0.06 | 0.12 | 2006 | 30.1 | 1.6833 | 0.3394 | 0.0523 | 0.0066 | 0.62 |  |
| 2023522a37 | 79-120-3-5-27 | spot      | 0.01 | 0.01 | 0.08 | 1359 | 20.4 | 2.4429 | 0.5547 | 0.0607 | 0.0092 | 0.66 |  |
| 2023522a38 | 79-120-3-5-28 | spot      | 0.01 | 0.00 | 0.14 | 2426 | 36.4 | 1.3267 | 0.3015 | 0.0487 | 0.0054 | 0.49 |  |
| 2023522a39 | 79-120-3-5-29 | spot      | 0.01 | 0.00 | 0.06 | 929  | 13.9 | 1.8038 | 0.5297 | 0.0515 | 0.0109 | 0.72 |  |
| 2023522a40 | 79-120-3-5-30 | spot      | 0.01 | 0.00 | 0.07 | 1169 | 17.5 | 3.9352 | 0.7758 | 0.0732 | 0.0097 | 0.67 |  |
| 2023522a44 | 79-120-3-5-31 | Line scan | 0.01 | 0.00 | 0.04 | 640  | 9.6  | 4.6913 | 1.1408 | 0.0799 | 0.0156 | 0.80 |  |
| 2023522a45 | 79-120-3-5-32 | Line scan | 0.00 | 0.00 | 0.02 | 403  | 6.0  | 4.7837 | 2.2439 | 0.0791 | 0.0390 | 0.99 |  |
| 2023522a46 | 79-120-3-5-33 | Line scan | 0.01 | 0.00 | 0.03 | 573  | 8.6  | 3.4020 | 1.1619 | 0.0647 | 0.0148 | 0.67 |  |
| 2023522a47 | 79-120-3-5-34 | Line scan | 0.01 | 0.01 | 0.06 | 966  | 14.5 | 2.5891 | 0.6608 | 0.0624 | 0.0118 | 0.74 |  |
| 2023522a48 | 79-120-3-5-35 | Line scan | 0.00 | 0.01 | 0.04 | 675  | 10.1 | 1.7659 | 0.6995 | 0.0546 | 0.0112 | 0.52 |  |
